# Supplementary material for: Contextual cues from cancer cells govern cancer-associated fibroblast heterogeneity
Source: PubMed Central journal article supplement — Cell Rep. Author manuscript; Available in PMC 2021 May 24. (PMC8142261; doi:10.1016/j.celrep.2021.109009), 2021-04-20
Supplement: NIHMS1696729-supplement-1.pdf [file NIHMS1696729-supplement-1.pdf]

**Supplemental information**

**Contextual cues from cancer cells govern  
cancer-associated fibroblast heterogeneity**

**Neus Bota-Rabassedas, Priyam Banerjee, Yichi Niu, Wenjian Cao, Jiayi Luo, Yuanxin Xi, Xiaochao Tan, Kuanwei Sheng, Young-Ho Ahn, Sieun Lee, Edwin Roger Parra, Jaime Rodriguez-Canales, Jacob Albritton, Michael Weiger, Xin Liu, Hou-Fu Guo, Jiang Yu, B. Leticia Rodriguez, Joshua J.A. Firestone, Barbara Mino, Chad J. Creighton, Luisa M. Solis, Pamela Villalobos, Maria Gabriela Raso, Daniel W. Sazer, Don L. Gibbons, William K. Russell, Gregory D. Longmore, Ignacio I. Wistuba, Jing Wang, Harold A. Chapman, Jordan S. Miller, Chenghang Zong, and Jonathan M. Kurie**

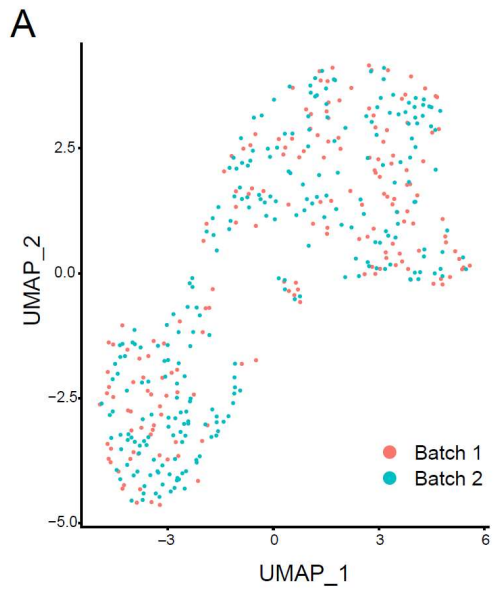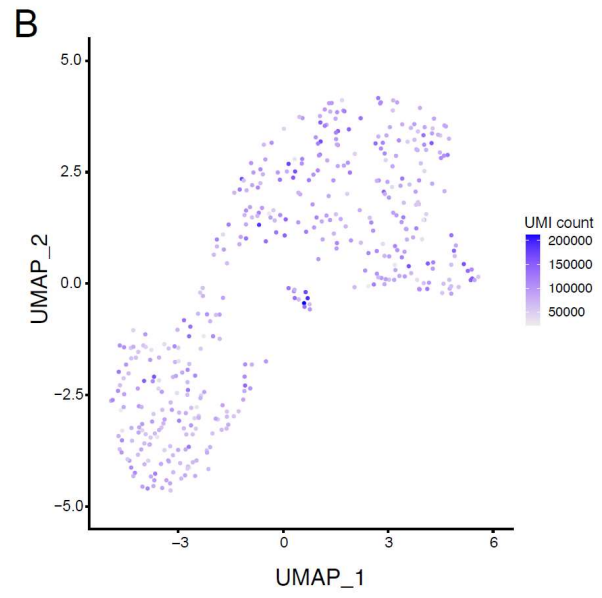

Figure S1. Single-cell RNA sequencing quality controls. Related to Figure 1. (A, B) PCA plots depict batch #1 and #2 (A) and Unique Marker Identifier (UMI) numbers in each cell (B).

A

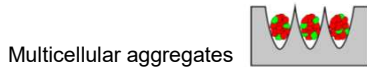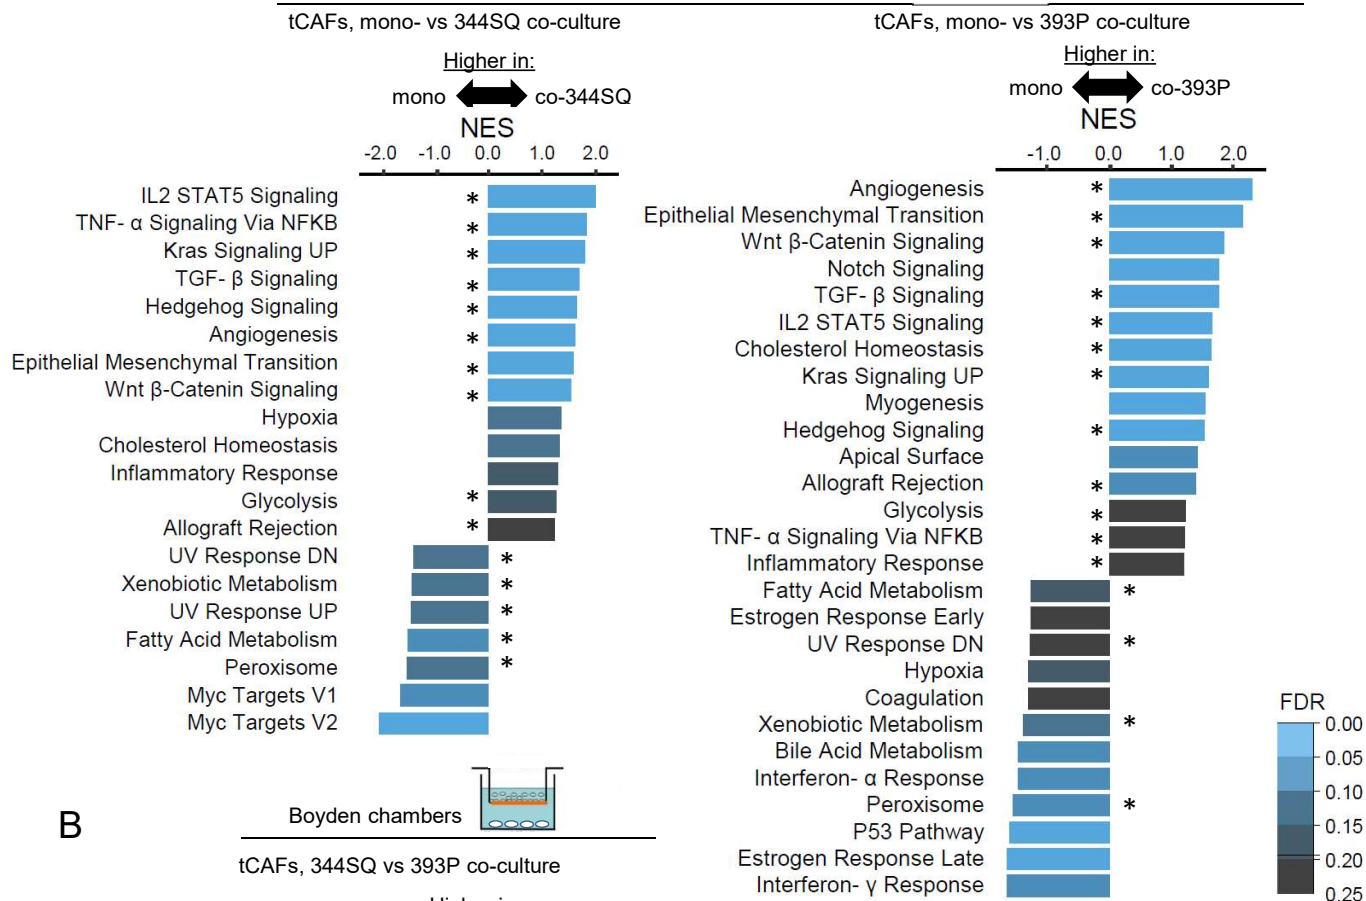

B

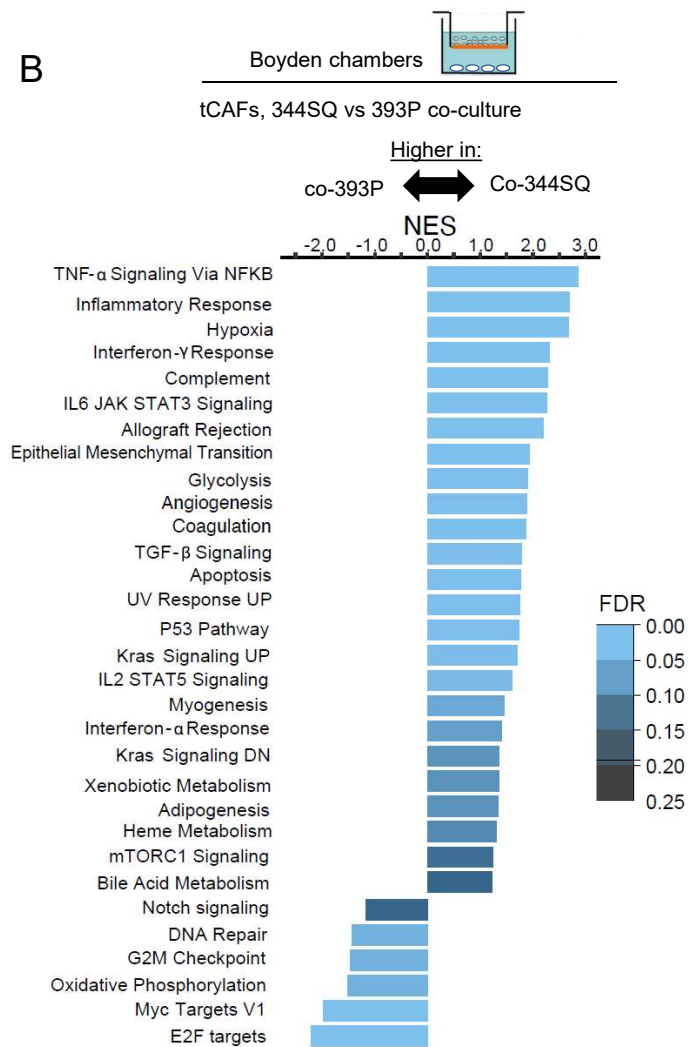

Supplementary Figure 2

Figure S2. LUAD cells at either end of the EMT spectrum shape tCAF heterogeneity. Related to Figure 2. (A) GSEA of upregulated genes in tCAFs that were mono-cultured (mono-) or co-cultured with 344SQ cells (co-344SQ) or 393P cells (co-393P) in multicellular aggregates. n= 3 biological replicates per condition. (B) GSEA of upregulated genes in tCAFs that were co-cultured with 344SQ cells (co-344SQ) or 393P cells (co-393P) in Boyden Chambers. NES represented by bar length. FDR values color-coded. n= 5 biological replicates per condition. Hallmarks that were shared between Boyden chambers and multicellular aggregates are indicated (A, asterisks).

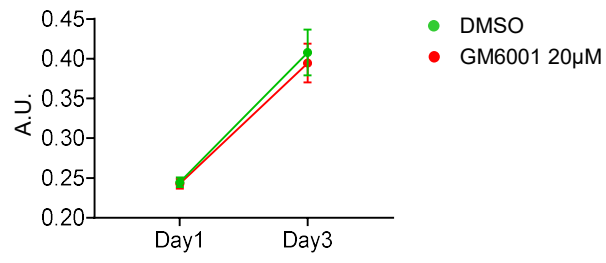

Supplementary Figure 3

Figure S3. Relative densities of tCAFs treated for indicated time periods with 20 $\mu$ M GM6001 (red) or vehicle dimethylsulfoxide (blue) determined by WST-1 assay. Related to Figure 4. A.U.: Absorbance units. n=3 biological replicates per condition.

A

## LC/MS

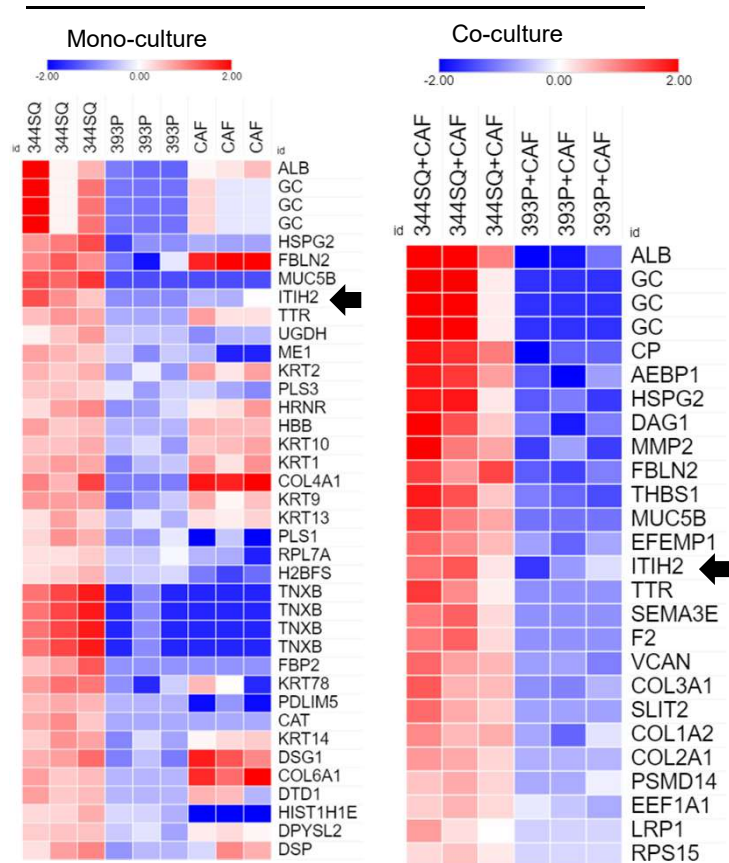

B

## Bulk-cell RNA-seq

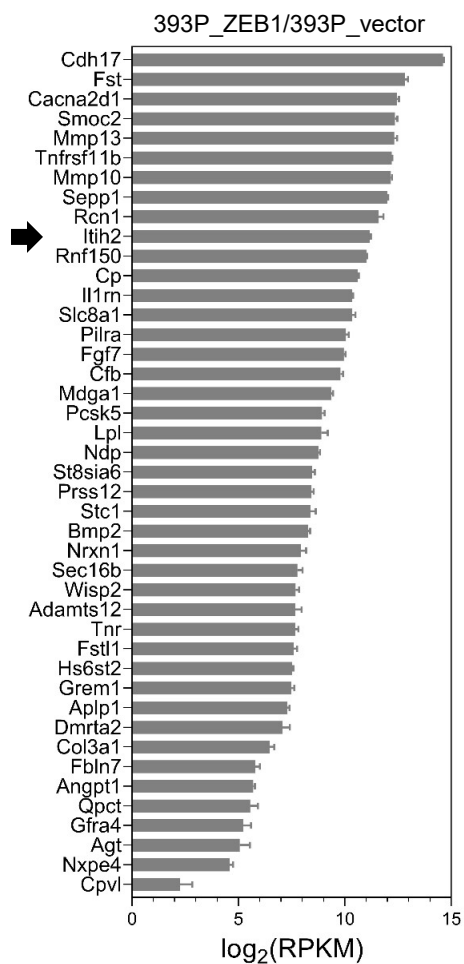



Figure S4. Identification of ZEB1-driven secreted factors. Related to Figure 6. (A) Heat map depiction of selected secreted factors identified by liquid chromatography-mass spectrometry analysis of conditioned medium samples from multicellular aggregates containing mono-cultured cells (left heat map) or co-cultured cells (right heat map). All proteins depicted had a P value < 0.05 (t-test). n=3 biological replicates per condition. (B) Relative levels of selected secreted factors identified by bulk-cell RNA sequencing (Tan et al., 2018). Values expressed as a ratio (393P\_ZEB1/393P\_vector). Log2FC: Log2 of fold change. n=3 biological replicates per condition
